# Supplementary material for: Impact of Collagen Peptide Supplementation in Combination with Long-Term Physical Training on Strength, Musculotendinous Remodeling, Functional Recovery, and Body Composition in Healthy Adults: A Systematic Review with Meta-analysis
Source: PubMed Central journal article supplement (PMC11561013; doi:10.1007/s40279-024-02079-0), 2024-07-26
Supplement: 40279_2024_2079_MOESM1_ESM.pdf [file 40279_2024_2079_MOESM1_ESM.pdf]

# **Impact of collagen peptide supplementation in combination with long-term physical training on strength, musculotendinous remodeling, functional recovery and body composition in healthy adults – A systematic review with meta-analysis**

**Kevin Bischof**<sup>2,4,\*</sup>, **Anna Maria Moitzi**<sup>1,4</sup>, **Savvas Stafilidis**<sup>3</sup>, **Daniel König**<sup>1,2,4</sup>

<sup>1</sup> Faculty of Life Sciences, Department for Nutrition, Section for Nutrition, Exercise and Health, University of Vienna, Vienna, Austria

<sup>2</sup> Centre for Sports Science and University Sports, Department of Sports Science, Section for Nutrition, Exercise and Health, University of Vienna, Vienna, Austria

<sup>3</sup> Centre for Sports Science and University Sports, Department for Biomechanics, Kinesiology and Computer Science in Sport, University of Vienna, Vienna, Austria

<sup>4</sup> Vienna Doctoral School of Pharmaceutical, Nutritional and Sport Sciences, University of Vienna, Vienna, Austria

**Journal Name:** Sports Medicine

**\* Correspondence:**

Kevin Bischof

kevin.bischof@univie.ac.at

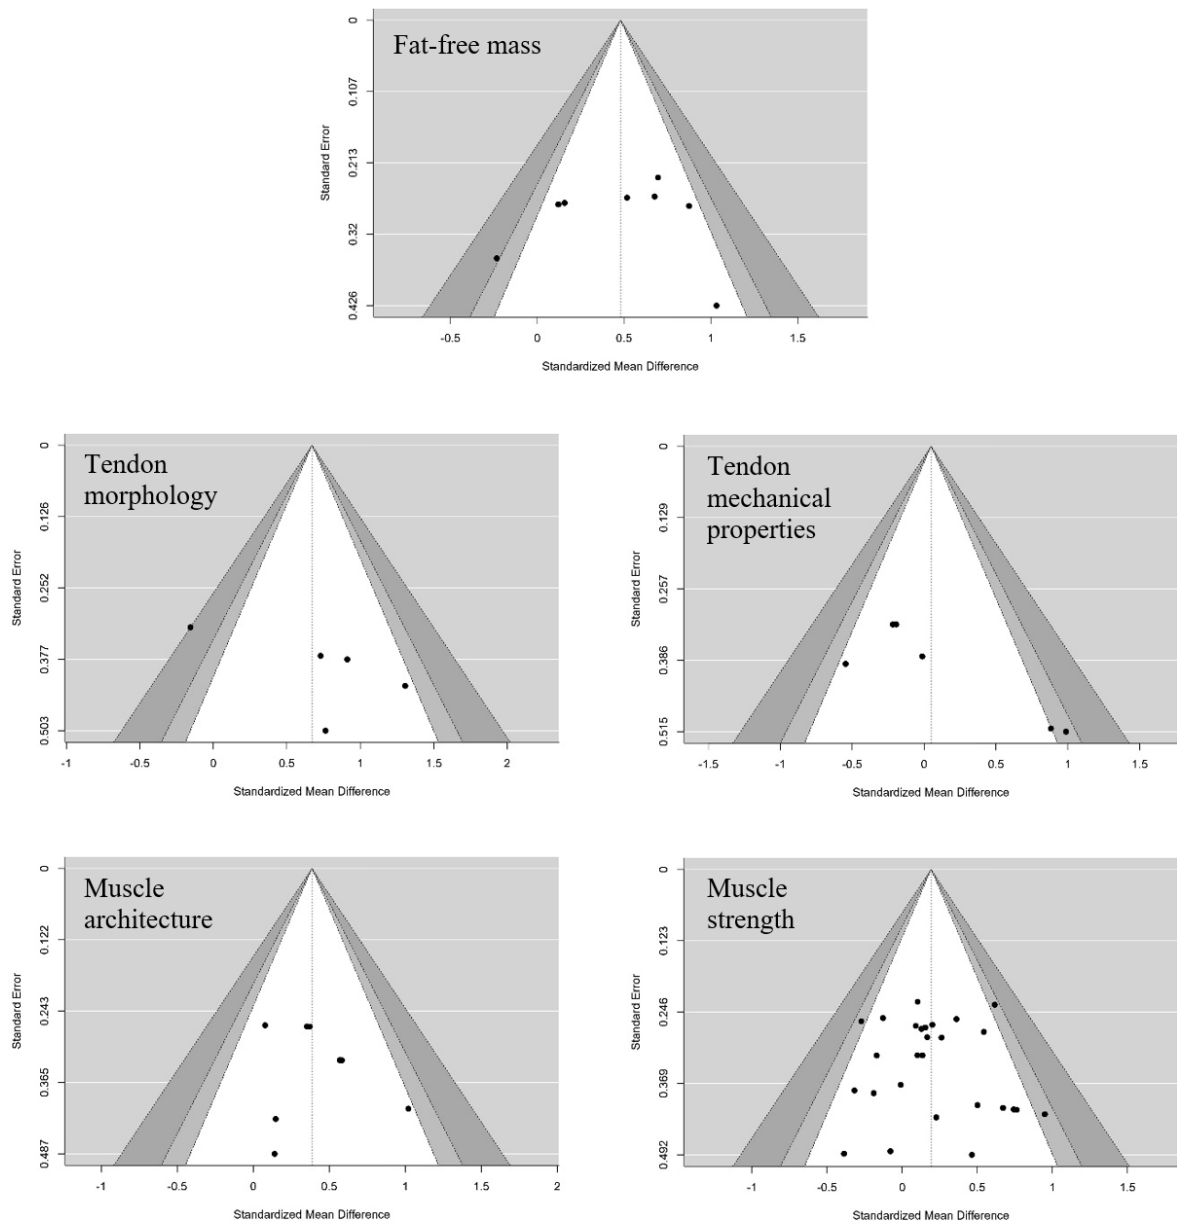

Figure S1: Funnel plots of fat-free mass, tendon morphology, mechanical properties, muscle architecture and strength from top left to bottom right. Black points indicate individual studies.

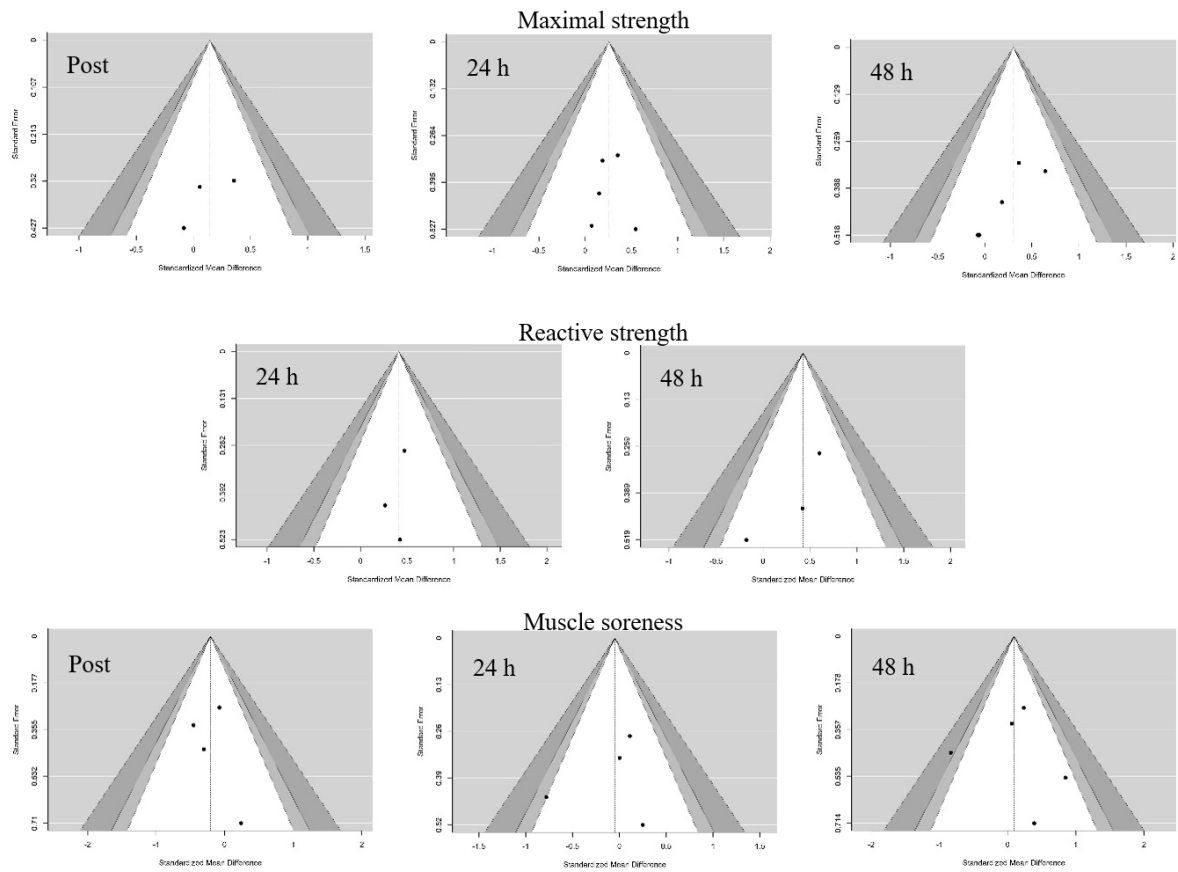

Figure S2: Funnel plots of recovery related parameters. Black points indicate individual studies.
